# Supplementary material
Source: ML conference proceedings conference paper supplement (https://proceedings.neurips.cc/paper_files/paper/2019/hash/bbf94b34eb32268ada57a3be5062fe7d-Abstract.html)
Supplement: Supplementary file [file bbf94b34eb32268ada57a3be5062fe7d-Supplemental.zip]

---

# Volumetric Correspondence Networks for Optical Flow

---

Gengshan Yang<sup>1\*</sup>, Deva Ramanan<sup>1,2</sup>

<sup>1</sup>Carnegie Mellon University, <sup>2</sup>Argo AI  
{gengshay, deva}@cs.cmu.edu

## 1 Supplementary Material

### 1.1 Detailed training procedure

We re-implement a Pytorch version of the training pipeline of PWC-Net[4], which has three stages: 1) Pre-training on FlyingChairs, 2) fine-tuning on FlyingThings and 3) fine-tuning on the target dataset.

**Pre-training on Chairs** We use the same hyper-parameters, except that: 1) The network is trained for 140K iterations instead of 1200K iterations, 2) the learning rate is set to be 1e-3 instead of 1e-4, and reduced by half at {70K,130K} iterations, and 3) the weight-decay term is removed.

**Fine-tuning on Things** We use the same hyper-parameters, except that: 1) The network is fine-tuned for 80K iterations instead of 500K iterations, 2) the learning rate is set as 2.5e-4 and reduced by half at 50K iterations, 3) the weight-decay term is removed, and 4) eight cropped images of size  $448 \times 320$  is used in each batch, instead of four cropped images of size  $768 \times 384$ .

**Fine-tuning on KITTI** We follow the PWC-Net+ procedure. Besides removing the weight-decay term, we also 1) use a crop of  $256 \times 768$  instead of  $320 \times 896$ , 2) use 4 GPUs with a batch-size of 16 for two cycles, 3) set the initial learning rate as 0.001, and reduce it by half at {30K,40K,50K,60K} iterations for each cycle, and 4) use  $L_1$  loss + OOR loss instead of the robust loss function. We also use asymmetric occlusion augmentation as used in HSM-Net [5].

**Fine-tuning on Sintel** We follow the PWC-Net+ procedure. Besides removing the weight-decay term, we also 1) use a crop of  $320 \times 576$  instead of  $384 \times 768$  and also add Chairs and Things for training, 2) use 4 GPUs with a batch-size of 16 for two cycles, 3) set the initial learning rate as 0.001, and reduce it by half at {30K,40K,50K,60K} iterations for each cycle, and 4) use  $L_1$  loss + OOR loss instead of the robust loss function. We also use asymmetric occlusion augmentation as used in HSM-Net [5].

### 1.2 Details on measuring FLOPS

We use FLOPS (floating point operations per second) to measure the compute needed for a deep network. It is typically calculated by counting the number of Mult-Adds (multiply-accumulate operation) [2, 3, 6]. For example, a dot product with N elements has N Mult-Adds. When computing the FLOPS, we only consider convolutions, batch-norms, activation functions, and pooling layers. The same python package is used to compute the FLOPS for each model [7].

### 1.3 Qualitative results

We further show qualitative results of our flow predictions following the Middlebury color encoding [1].

---

\*Code will be available at [github.com/gengshay-y/VCN](https://github.com/gengshay-y/VCN).

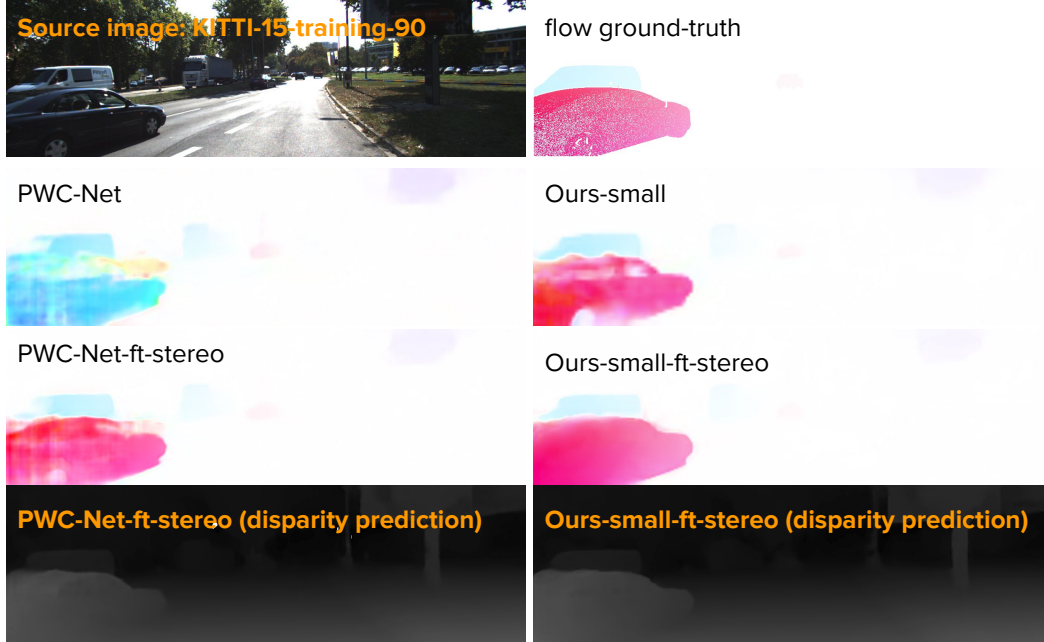

Figure 1: Qualitative results for stereo  $\rightarrow$  flow transfer. Before fine-tuning, PWC-Net predicts the motion of the left-corner car wrong while our model gets the motion correctly. After fine-tuning, although PWC-Net and ours-small performs similarly on the stereo training data, PWC-Net produces artifact at object boundaries while our model is able to recover the object boundaries clearly.

- Fig. 1 shows the results of “stereo to flow transfer”.
- Fig. 2 gives a qualitative comparison between our model and PWC-Net on flow predicted by each scale.
- Fig. 3 shows the K flow hypotheses generated by each level of coarse-to-fine prediction.
- Fig. 4 and Fig. 5 show qualitative comparisons with prior arts on challenging examples from KITTI-15 and Sintel test set.

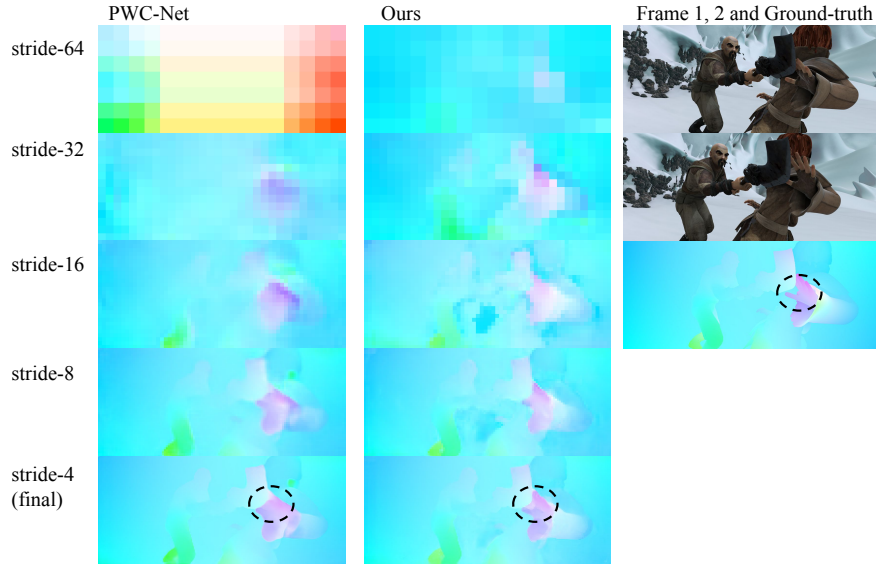

Figure 2: Comparison of coarse-to-fine prediction between our model and PWC-Net\_ROB on Sintel\_clean\_ambush\_2\_00. Note that the coarse (stride-64) flow prediction module of PWC-Net is not trainable due to difficulties in optimization. However, our stride-64 matching module is trainable and yields reasonable coarse-prediction. We hypothesize the reason to be that 4D volumetric layers takes advantage of weight-sharing and uses much fewer parameters, which makes gradient propagation easier. Moreover, our model predicts better details as shown in the circle.

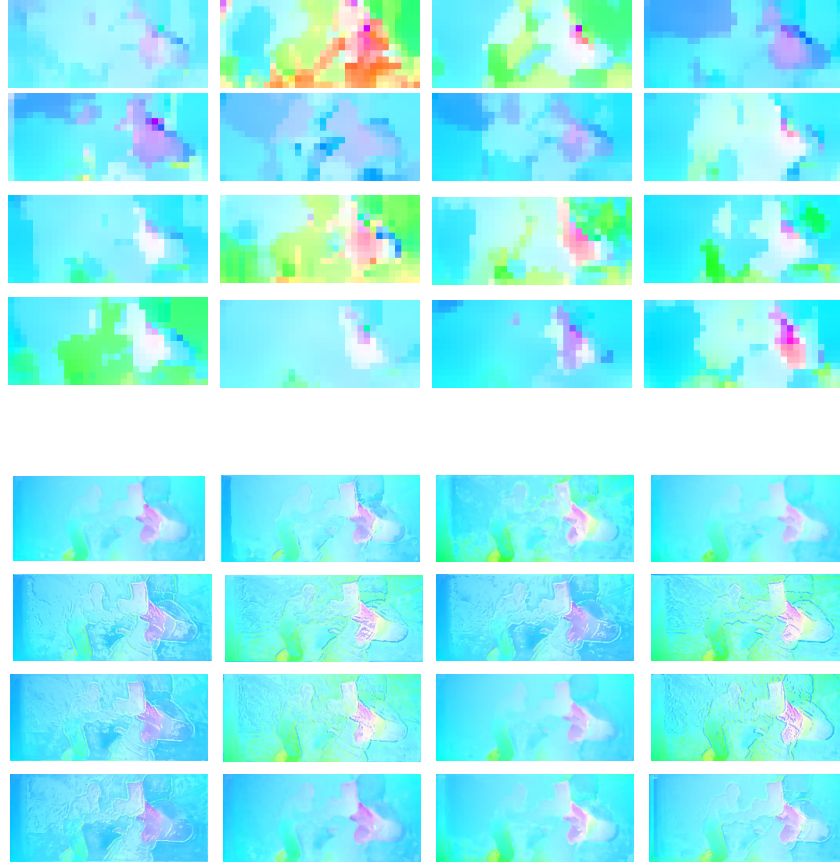

Figure 3: Multi-hypotheses predictions for Sintel\_clean\_ambush\_2\_00. From top to bottom: hypotheses at stride-32 and hypothese at stride-4.

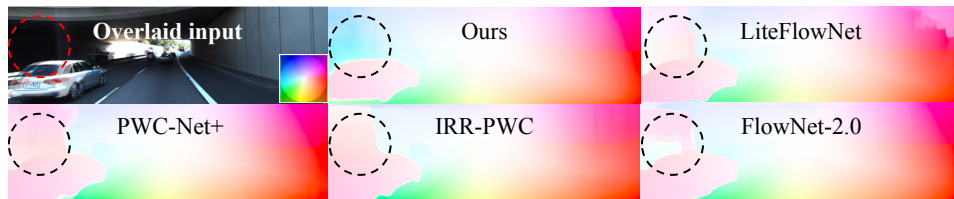

Figure 4: Results on KITTI-15 test image 48. Color indicates the direction and magnitude of the displacements following Middlebury color wheel, as shown on top-left. While prior methods predict the dark wall (circled) as moving to the right together with the front vehicle, our method correctly predicts it as moving to the left.

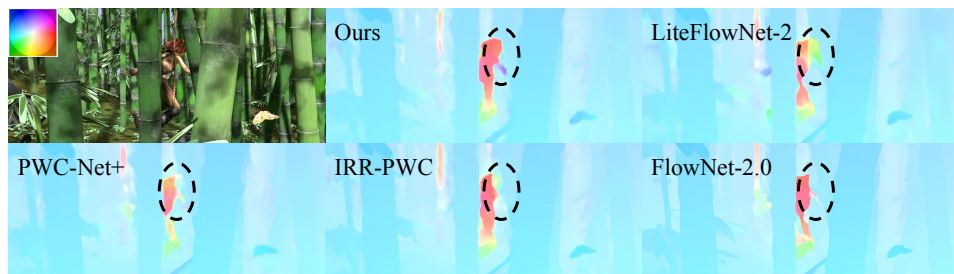

Figure 5: Results on Sintel test image bamboo\_3\_29. Compared with prior arts, our method predicts the motion of the circled region more accurately and captures more details.

## References

- [1] S. Baker, D. Scharstein, J. Lewis, S. Roth, M. J. Black, and R. Szeliski. A database and evaluation methodology for optical flow. *IJCV*, 92(1):1–31, 2011.
- [2] K. He, X. Zhang, S. Ren, and J. Sun. Deep residual learning for image recognition. In *Proceedings of the IEEE conference on computer vision and pattern recognition*, pages 770–778, 2016.
- [3] A. G. Howard, M. Zhu, B. Chen, D. Kalenichenko, W. Wang, T. Weyand, M. Andreetto, and H. Adam. Mobilenets: Efficient convolutional neural networks for mobile vision applications. *arXiv preprint arXiv:1704.04861*, 2017.
- [4] D. Sun, X. Yang, M. Liu, and J. Kautz. Models matter, so does training: An empirical study of cnns for optical flow estimation. *PAMI*, 2019.
- [5] G. Yang, J. Manela, M. Happold, and D. Ramanan. Hierarchical deep stereo matching on high-resolution images. In *CVPR*, 2019.
- [6] X. Zhang, X. Zhou, M. Lin, and J. Sun. Shufflenet: An extremely efficient convolutional neural network for mobile devices. In *CVPR*, pages 6848–6856, 2018.
- [7] L. Zhu. pytorch-opcounter. <https://github.com/Lyken17/pytorch-OpCounter>, 2019.
